# Supplementary material for: A moderate intensity ligand works best: a theoretical study on passivation effects of pyridine-based molecules for perovskite solar cells
Source: Royal Society of Chemistry journal article supplement (doi:10.1039/d3nr01296d), 2023-01-01
Supplement: d3nr01296d1.pdf [file d3nr01296d1.pdf]

Supporting Information

**Moderate intensity ligand works best: a theoretical study on  
passivation effects of pyridine-based molecules for perovskite solar  
cells**

Na Chen, Weiyi Zhang, Quan-Song Li\*

Key Laboratory of Cluster Science of Ministry of Education

Beijing Key Laboratory of Photoelectronic/Electrophotonic Conversion Materials

School of Chemistry and Chemical Engineering

Beijing Institute of Technology, 100081 Beijing, China

E-mail: [liquansong@bit.edu.cn](mailto:liquansong@bit.edu.cn)

## Supporting Information

### Contents

|                                                                                                                                            |      |
|--------------------------------------------------------------------------------------------------------------------------------------------|------|
| <b>Figure S1.</b> The adsorption configuration of $\text{H}_2\text{O}@MAPbI_3$ .....                                                       | SI 3 |
| <b>Figure S2.</b> Structure of Tpy-1S, adsorption configuration, band structure and PDOS<br>for Tpy-1S@MAPbI <sub>3</sub> .....            | SI 4 |
| <b>Figure S3.</b> Charge densities of VBM and CBM.....                                                                                     | SI 5 |
| <b>Figure S4.</b> Initial AIMD configuration for $\text{H}_2\text{O-PMs}@MAPbI_3$ .....                                                    | SI 6 |
| <b>Figure S5.</b> Time evolution of the energy fluctuations for $\text{H}_2\text{O-PMs}@MAPbI_3$ .....                                     | SI 7 |
| <b>Figure S6.</b> Snapshots of AIMD simulation for $\text{H}_2\text{O-Py}@MAPbI_3$ and $\text{H}_2\text{O-}$<br>$\text{Bpy}@MAPbI_3$ ..... | SI 8 |

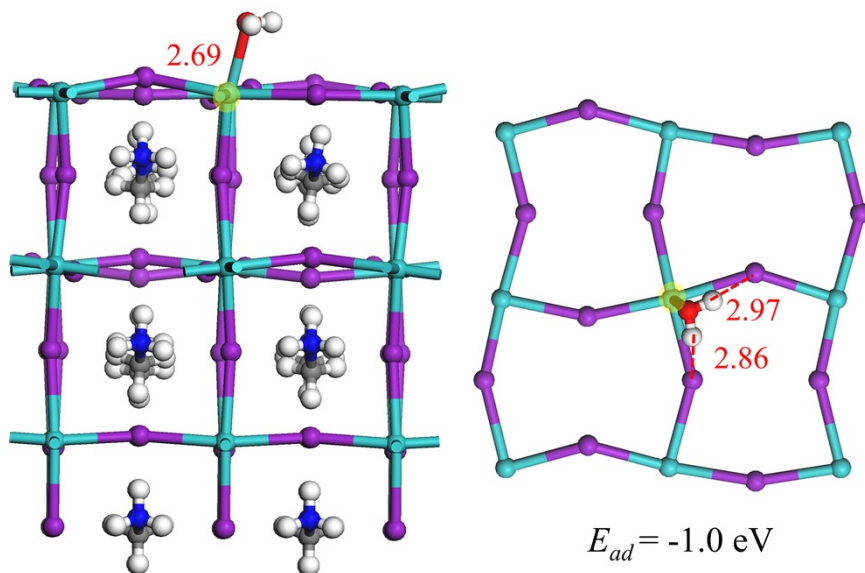

Figure S1. The adsorption configuration of  $H_2O@MAPbI_3$ .

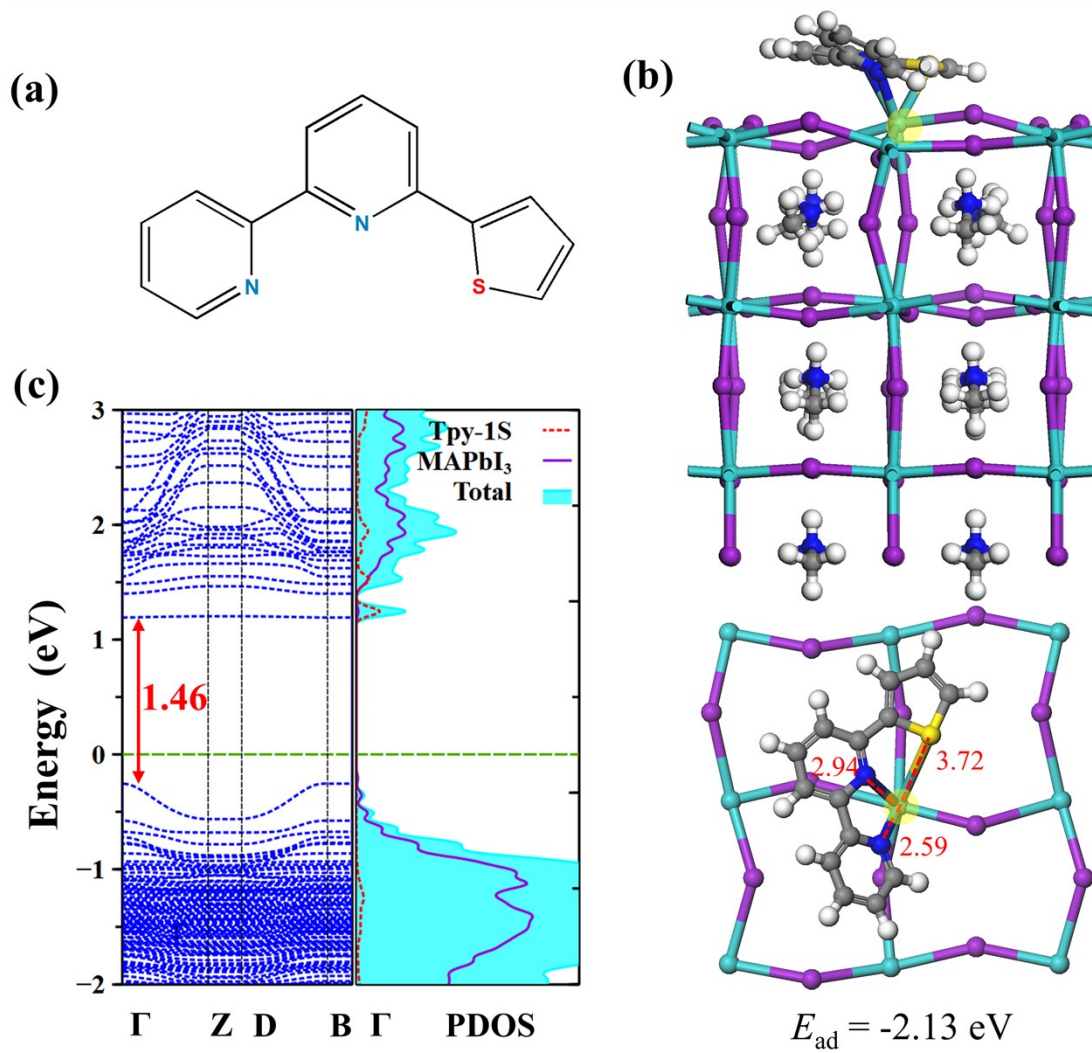

Figure S2. (a) Structure of Tpy-1S, (b) optimized adsorption configuration and (c) band structure and projected density of states (PDOS) for Tpy-1S@MAPbI<sub>3</sub>.

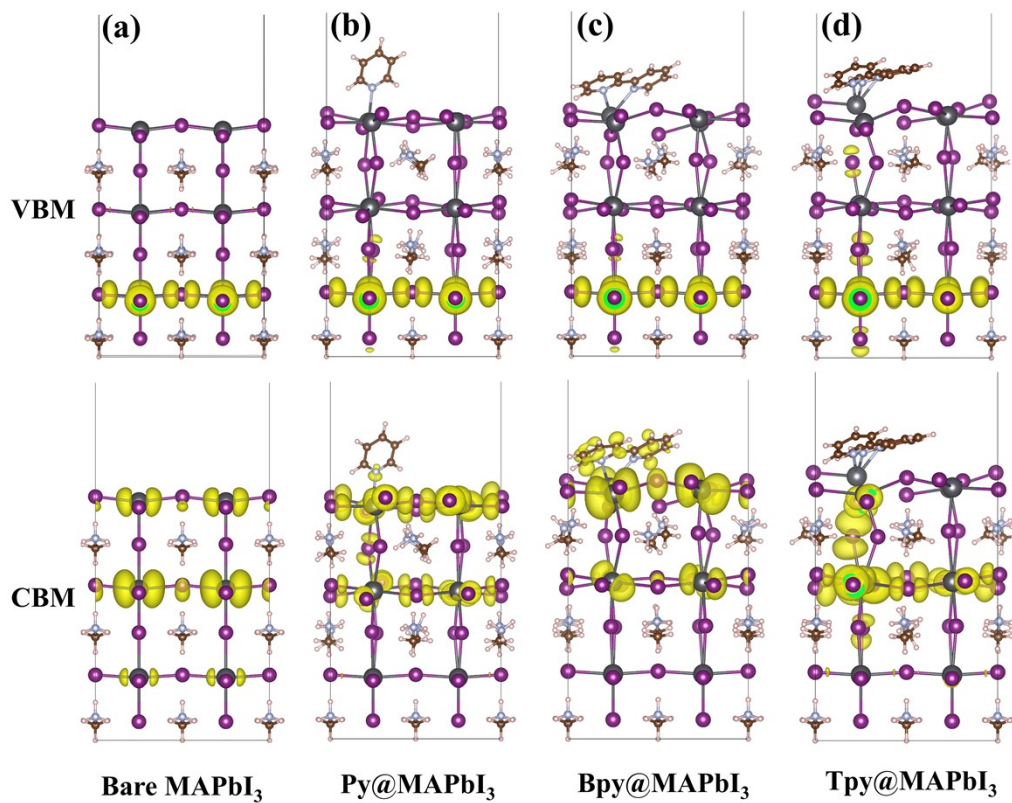

Figure S3. Charge densities of VBM and CBM for (a) bare MAPbI<sub>3</sub>, (b) Py@MAPbI<sub>3</sub>, (c) Bpy@MAPbI<sub>3</sub>, and (d) Tpy@MAPbI<sub>3</sub>, respectively. The isosurface level is 0.0008 e/Bohr<sup>3</sup>.

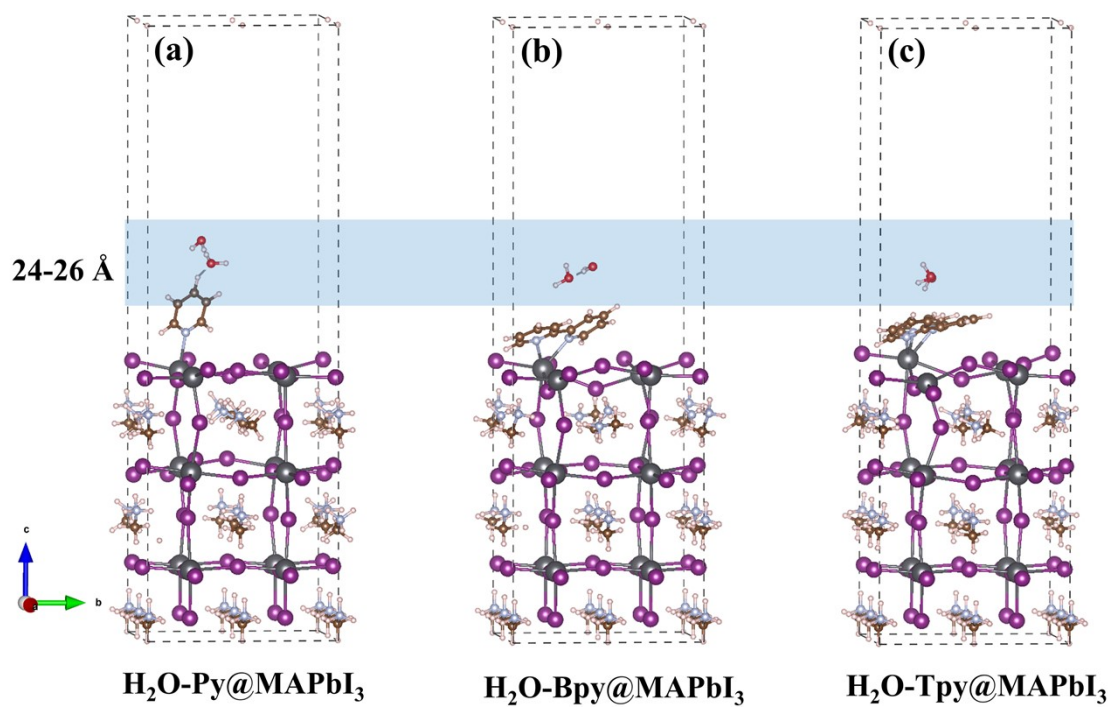

Figure S4. Initial AIMD configurations for  $\text{H}_2\text{O-PMs@MAPbI}_3$ .

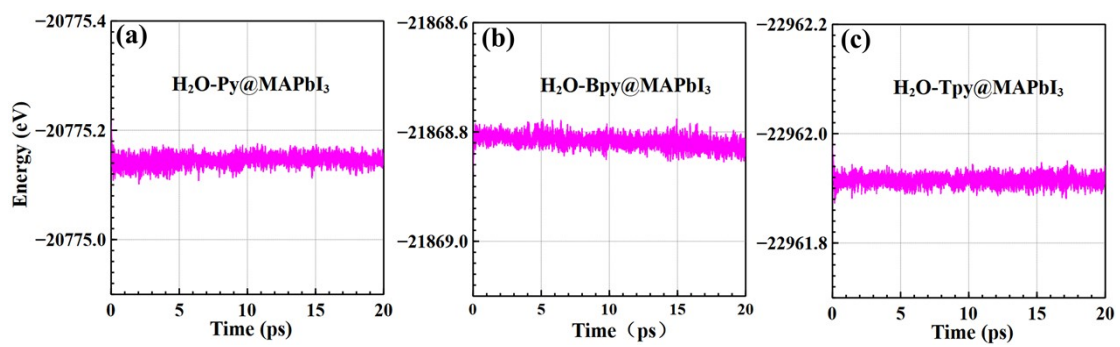

Figure S5. Time evolution of the energy fluctuations for H<sub>2</sub>O-PMs@MAPbI<sub>3</sub>.

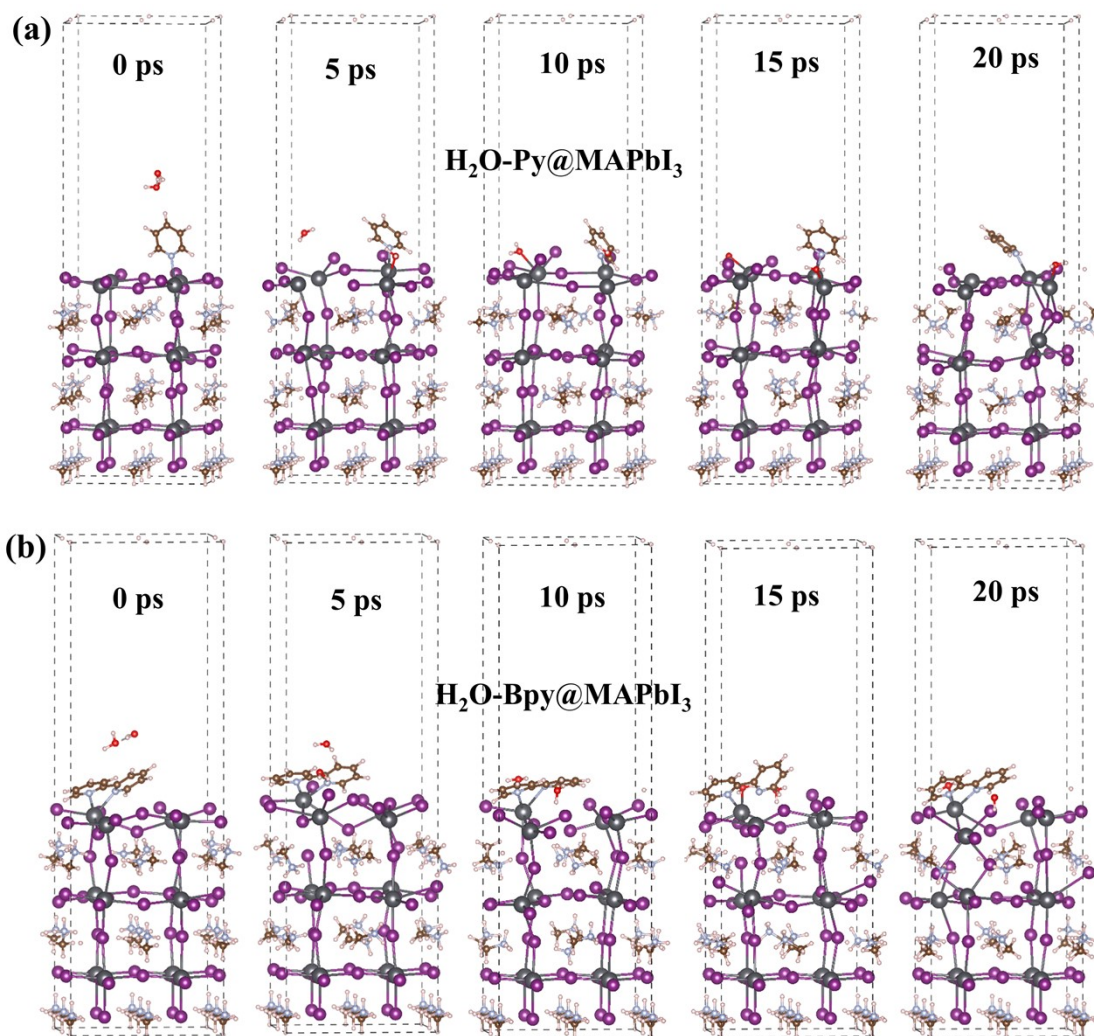

Figure S6. Snapshots of AIMD simulation at 0, 5, 10, 15, and 20 ps for (a)  $\text{H}_2\text{O-Py@MAPbI}_3$ , and (b)  $\text{H}_2\text{O-Bpy@MAPbI}_3$  systems at 300 K.
